# Supplementary material for: Assessment of the Diagnostic Utility of Serum MicroRNA Classification in Patients With Diffuse Glioma
Source: PubMed Central journal article supplement (PMC6902771; doi:10.1001/jamanetworkopen.2019.16953), 2019-12-06
Supplement: jamanetwopen-2-e1916953-s001.pdf [file jamanetwopen-2-e1916953-s001.pdf]

## Supplementary Online Content

Ohno M, Matsuzaki J, Kawauchi J, et al. Assessment of the diagnostic utility of serum microRNA classification in patients with diffuse glioma. *JAMA Netw Open*. 2019;2(12):e1916953. doi:10.1001/jamanetworkopen.2019.16953

**eMethods 1.** Molecular Diagnosis of Diffuse Glioma

**eMethods 2.** Algorithm: Procedure for Constructing 2-Group Discrimination Models

**eMethods 3.** Algorithm: Procedure for Constructing 3-Group Discrimination Models

**eTable 1.** Differences in Age and Sex Distribution Between Diffuse Glioma and Noncancer Controls

**eTable 2.** Differences in Age and Sex Distribution Between Glioblastoma, Primary Central Nervous System Lymphoma, and Metastatic Brain Tumors

**eTable 3.** The 48 miRNAs of the 3-Tumor Index for Discriminating Among Glioblastoma, Primary Central Nervous System Lymphoma, and Metastatic Brain Tumors

**eFigure 1.** Diagnostic Utility of a Single miRNA to Distinguish Glioma From Noncancer

**eFigure 2.** Validation of the Glioma Index

**eFigure 3.** Development of the 3-Tumor Index

**eReferences.**

This supplementary material has been provided by the authors to give readers additional information about their work.

## **eMethods 1. Molecular Diagnosis of Diffuse Glioma**

### **Determination of *IDH1/2* mutation status**

*IDH1/2* mutation status was determined as previously described<sup>1</sup>. Briefly, total DNA was extracted from frozen tissue samples or paraffin-embedded specimens using a DNeasy Blood & Tissue kit (Qiagen, Maryland, USA). Polymerase chain reaction (PCR) was performed to amplify a 129 base pair (bp) fragment of *IDH1* containing codon 132 or a 150 bp fragment of *IDH2* containing codon 172. The PCR products were purified using the QIAquick PCR Purification kit (Qiagen, Maryland, USA). DNA sequencing of the *IDH1/2* gene was performed using the same primers used for PCR<sup>1</sup>.

### **1p and 19q status by multiplex ligation-dependent probe amplification analysis**

The SALSA P088 kit (MRC, Amsterdam, Netherlands) containing 16 1p probes (6 probes at 1p36), 8 19q probes, and 21 control probes specific to other chromosomes, including 2 probes for 19p, was used. Information regarding the probe sequences and ligation sites can be found at <http://www.mlpa.com>. Multiplex ligation-dependent probe amplification analysis was performed as previously described<sup>2</sup>. 1p36 or 19q deletions were considered present when five of six markers for 1p36 and five of eight markers for 19q in each chromosome arm had normalized ratios <0.75.

## eMethods 2. Algorithm: Procedure for Constructing 2-Group Discrimination

### Models

Notation:

N: Number of candidate sets of miRNAs

M: Maximum combined number of miRNAs in each candidate set

T: Total number of miRNAs

Score: Accuracy =  $(TP + TN) / (TP + FP + FN + TN)$ , where each variable is defined as follows:

|                     | Cancer                        | Non-cancer                    |
|---------------------|-------------------------------|-------------------------------|
| Prediction positive | TP: number of true positives  | FP: number of false positives |
| Prediction negative | FN: number of false negatives | TN: number of true negatives  |

### Procedure for constructing two-group discrimination models

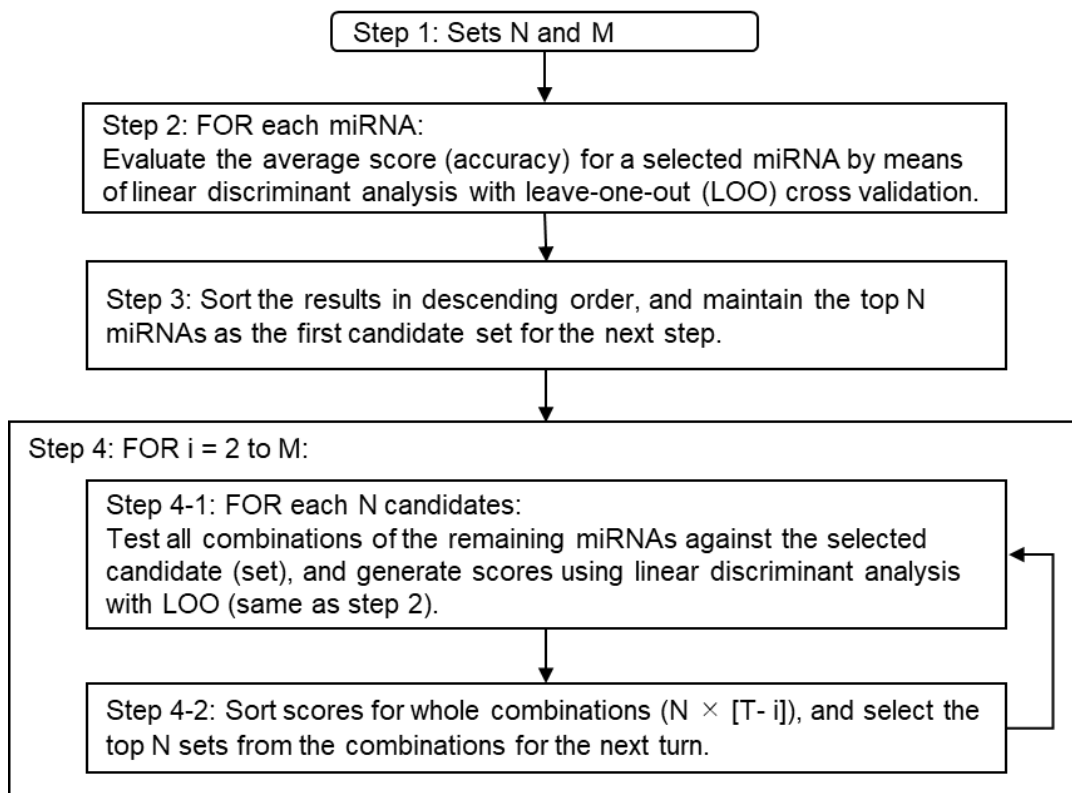

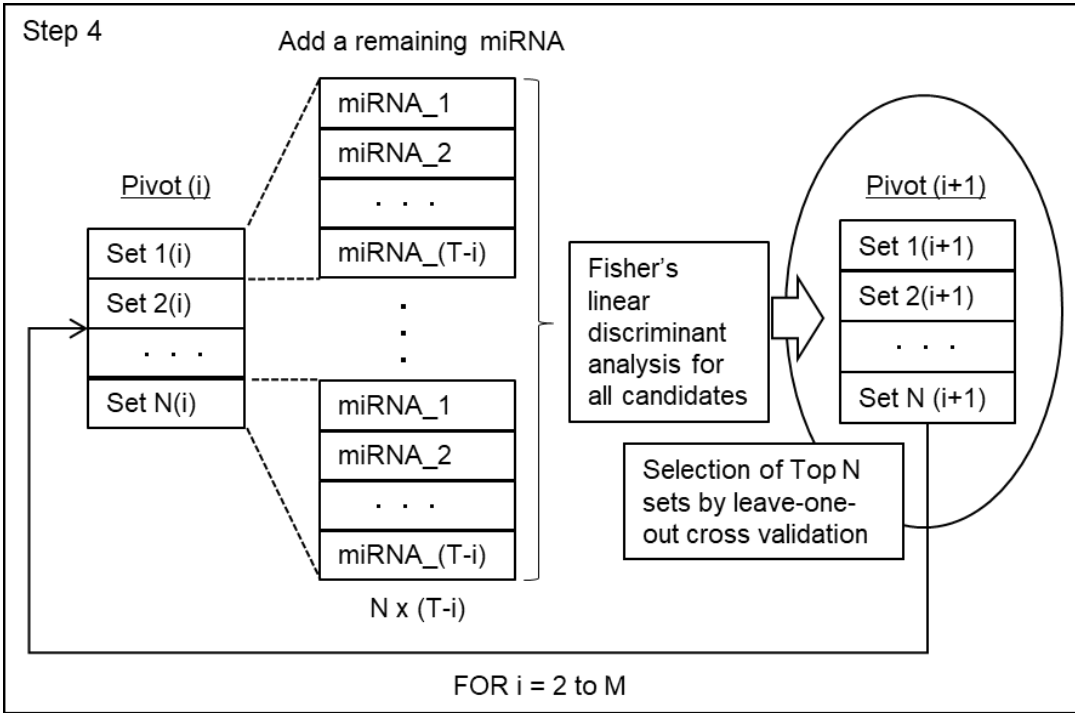

### eMethods 3. Algorithm: Procedure for Constructing 3-Group Discrimination Models

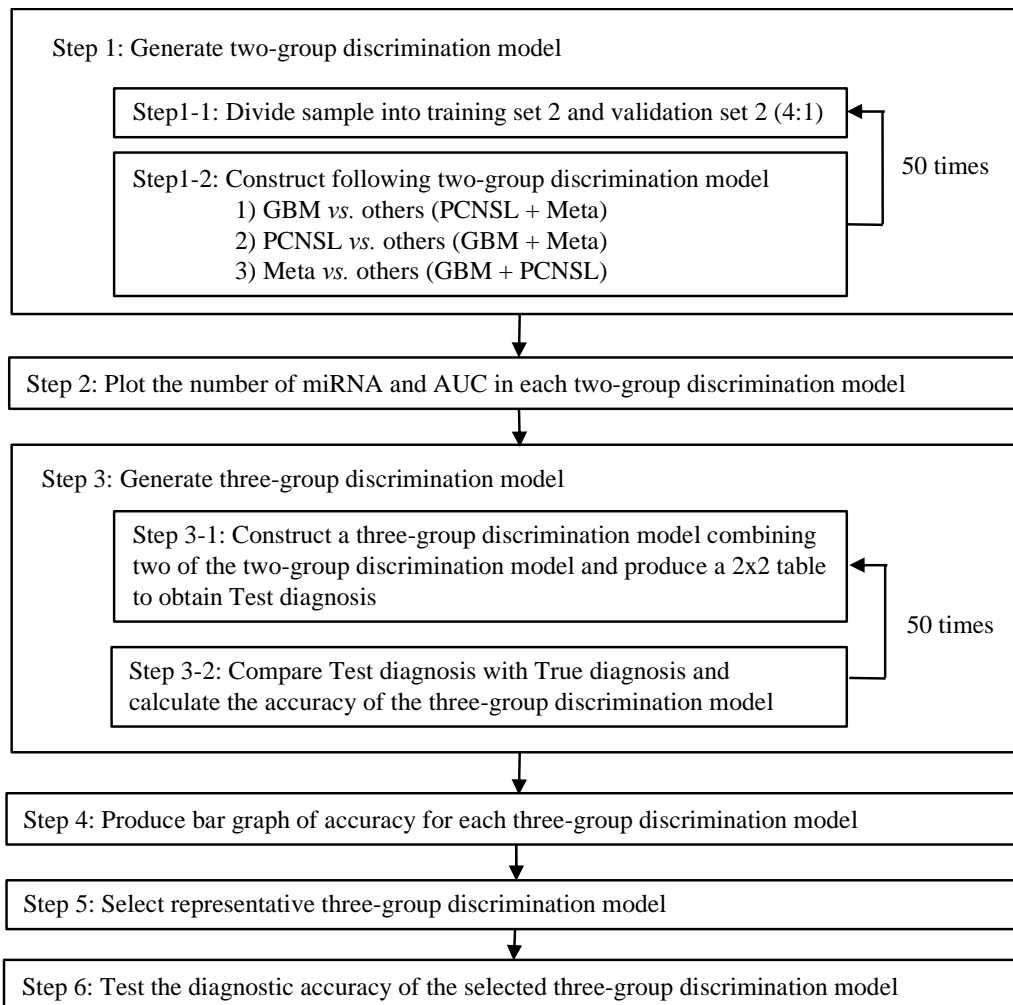

**eTable 1. Differences in Age and Sex Distribution Between Diffuse Glioma and Noncancer Controls**

|                           | Diffuse glioma | Non-cancer control | p-value |
|---------------------------|----------------|--------------------|---------|
| Training set 1            |                |                    |         |
| Total No. (%) of controls | 100 (100)      | 200 (100)          |         |
| Age, median (range), y    | 56 (14-87)     | 56 (14-87)         | 0.76    |
| Sex, No (%)               |                |                    |         |
| Male                      | 55 (55)        | 105 (53)           | 0.71    |
| Female                    | 45 (45)        | 95 (47)            |         |
| Validation set 1          |                |                    |         |
| Total No. (%) of controls | 57 (100)       | 114 (100)          |         |
| Age, median (range), y    | 54 (17-84)     | 56 (21-85)         | 0.27    |
| Sex, No (%)               |                |                    |         |
| Male                      | 34 (60)        | 58 (51)            | 0.33    |
| Female                    | 23 (40)        | 56 (49)            |         |

**eTable 2. Differences in Age and Sex Distribution Between Glioblastoma, Primary Central Nervous System Lymphoma, and Metastatic Brain Tumors**

|                           | Glioblastoma | Primary central nervous system lymphoma | Metastatic brain tumors | p-value |
|---------------------------|--------------|-----------------------------------------|-------------------------|---------|
| Total No. (%) of controls | 85 (100)     | 42 (100)                                | 28 (100)                |         |
| Age, median (range), y    | 64 (17-87)   | 68 (26-83)                              | 65 (24-76)              | 0.35    |
| Sex, No (%)               |              |                                         |                         |         |
| Male                      | 50 (59)      | 28 (67)                                 | 15 (54)                 | 0.52    |
| Female                    | 35 (41)      | 14 (33)                                 | 13 (46)                 |         |

**eTable 3. The 48 miRNAs of the 3-Tumor Index for Discriminating Among Glioblastoma, Primary Central Nervous System Lymphoma, and Metastatic Brain Tumors**

| PCNSL vs. others |                    | Meta vs. others |                     |
|------------------|--------------------|-----------------|---------------------|
| miRNA            | coefficient        | miRNA           | coefficient         |
| miR-6805-3p      | 0.190489650252051  | miR-106a-3p     | -0.169331585033951  |
| miR-7975         | 0.0517934180028152 | miR-8089        | -0.112387073327149  |
| miR-150-3p       | 0.0665429842438766 | miR-486-3p      | -0.262743085618485  |
| miR-1260b        | 0.0798221872319207 | miR-342-5p      | -0.358975372637574  |
| miR-4463         | -0.534594030509306 | miR-4745-5p     | 0.931617802602443   |
| miR-6515-3p      | -0.042686416640624 | miR-4436b-5p    | 0.186040255268863   |
| miR-6766-3p      | 0.0463998153269611 | miR-1343-5p     | 0.99465235140153    |
| miR-6877-5p      | 0.114096181422196  | miR-211-3p      | -0.043161525668922  |
| (Intercept)      | 0.448392266883874  | miR-6802-5p     | -0.0490187784742703 |
|                  |                    | miR-5196-5p     | 0.182874895847875   |
|                  |                    | miR-150-3p      | -0.0857222032212309 |
|                  |                    | miR-4771        | 0.356212246362562   |
|                  |                    | miR-4708-3p     | -0.120221341715771  |
|                  |                    | miR-532-3p      | 0.0971112759086939  |
|                  |                    | miR-4656        | 0.735777831882568   |
|                  |                    | miR-2116-3p     | -0.0495061766171574 |
|                  |                    | miR-365a-5p     | -0.351490105773066  |
|                  |                    | miR-933         | 0.147348446578719   |
|                  |                    | miR-6124        | 0.172233229713192   |
|                  |                    | miR-3620-5p     | 0.110134738673348   |
|                  |                    | miR-4258        | -0.844141800239268  |
|                  |                    | miR-4463        | -5.06699399218911   |
|                  |                    | miR-6070        | -0.438010489511108  |
|                  |                    | miR-7113-3p     | 0.157441741158861   |
|                  |                    | miR-602         | 0.136609511995946   |



|                                                                                                                                      |  |                      |                     |
|--------------------------------------------------------------------------------------------------------------------------------------|--|----------------------|---------------------|
|                                                                                                                                      |  | miR-4476             | -0.09895499489422   |
|                                                                                                                                      |  | miR-6752-5p          | 0.604317562770886   |
|                                                                                                                                      |  | miR-5195-3p          | -0.399759936495029  |
|                                                                                                                                      |  | miR-527, miR-518a-5p | -0.177548780512667  |
|                                                                                                                                      |  | miR-4633-3p          | -0.0638715916223451 |
|                                                                                                                                      |  | miR-4758-5p          | -0.905128414759015  |
|                                                                                                                                      |  | miR-6515-3p          | 0.279852663573411   |
|                                                                                                                                      |  | miR-4706             | -0.128531860847318  |
|                                                                                                                                      |  | miR-92a-2-5p         | 0.0667828090931865  |
|                                                                                                                                      |  | miR-6721-5p          | 0.0146798829604962  |
|                                                                                                                                      |  | miR-4454             | 0.452555086047712   |
|                                                                                                                                      |  | miR-4449             | -0.108063588826539  |
|                                                                                                                                      |  | miR-1233-5p          | 0.393322000540513   |
|                                                                                                                                      |  | miR-4787-3p          | -0.831389608058257  |
|                                                                                                                                      |  | miR-6796-3p          | 0.464305123117306   |
|                                                                                                                                      |  | miR-4313             | 0.357508573387304   |
|                                                                                                                                      |  | miR-1225-5p          | 0.102500142942516   |
|                                                                                                                                      |  | miR-1224-3p          | 0.0478254585863892  |
|                                                                                                                                      |  | (Intercept)          | 30.1186134638357    |
| LASSO: Least absolute shrinkage and selection operator, PCNSL: Primary central nervous system lymphoma, Meta: Metastatic brain tumor |  |                      |                     |

**Figure 1. Diagnostic Utility of a Single miRNA to Distinguish Glioma From Noncancer**

Receiver operating characteristic (ROC) curves for the detection of patients with diffuse glioma using miR-4763-3p, miR-1915-3p, and miR-3679-5p in validation set 1. The area under the curve (AUC) values for miR-4763-3p, miR-1915-3p, and miR-3679-5p were 0.92, 0.79, and 0.63, respectively.

A

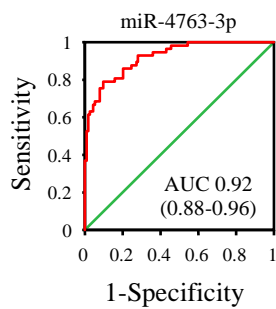

B

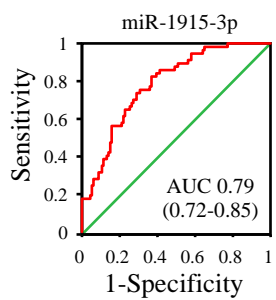

C

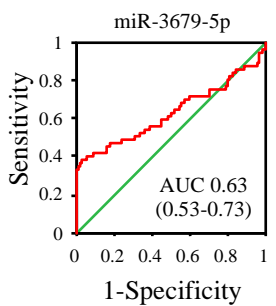

## Figure 2. Validation of the Glioma Index

### A) Principal component analysis

Principal component analysis of the Glioma Index, showing clear separation between diffuse gliomas and non-cancer controls using validation set 1. N = 57 for diffuse glioma, and 114 for non-cancer.

### B) Dot plot of the Glioma Index in diffuse glioma and non-cancer controls

The Glioma Index discriminated diffuse gliomas from non-cancer controls irrespective of diffuse glioma subtype in validation set 1. Each diagnostic accuracy (%) is included. N = 11 for diffuse astrocytoma, grade II (DA); 3 for oligodendroglioma, grade II (OL); 10 for anaplastic astrocytoma, grade III; 4 for anaplastic oligodendroglioma, grade III (AO); 29 for glioblastoma, grade IV (GBM); 57 for Non-cancer 1 (NC1); and 57 for Non-cancer 2 (NC2).

A

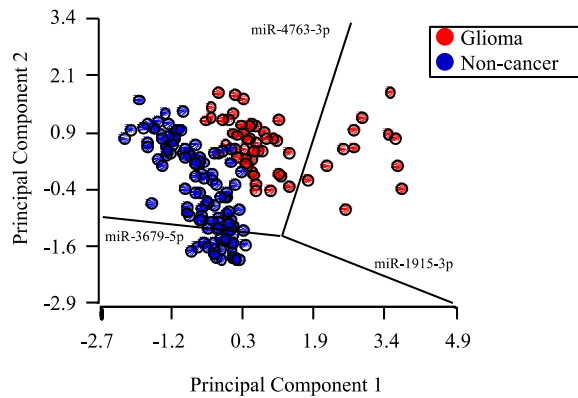

B

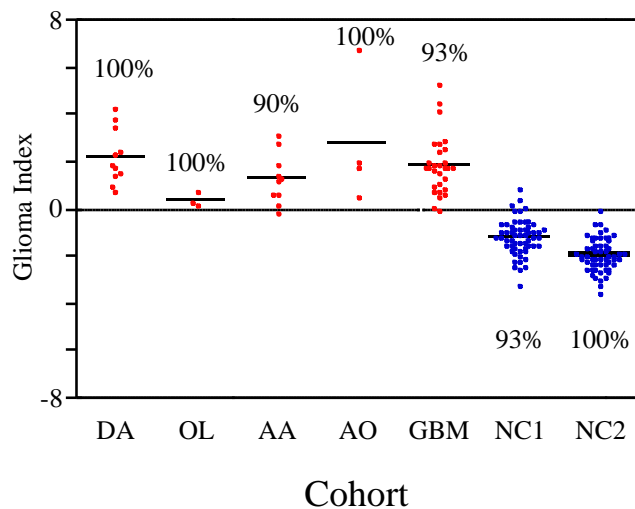

### eFigure 3. Development of the 3-Tumor Index

#### A-C) Relationship between the area under the curve (AUC) and the number of miRNAs in 50 different two-group discrimination models in training set 2

The X and Y axes indicate the number of miRNAs and the AUC, respectively. The 50 different two-group discrimination models were plotted as open circles. The red open circle indicates the average number of miRNAs and the error bar indicates standard deviation.

A) In the GBM vs. others discrimination model, the average number of miRNAs was 22.6 and the mean AUC was 0.91.

B) In the PCNSL vs. others discrimination model, the average number of miRNAs was 16.0 and the mean AUC was 0.86.

C) In the Meta vs. others discrimination model, the average number of miRNAs was 21.1 and the mean AUC was 0.97.

A

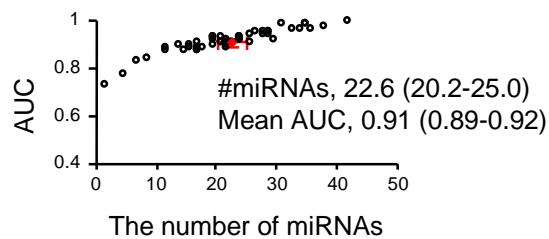

B

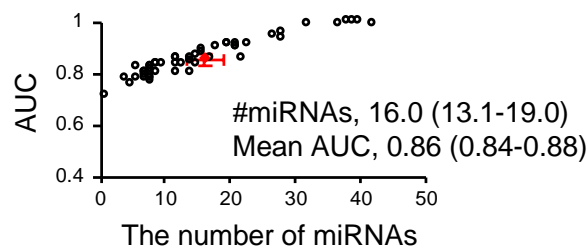

C

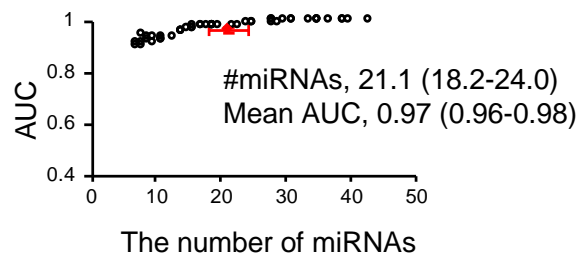

**D-F) Combination of two-group discrimination models to produce a 2 × 2 table for analyzing the model accuracy in training set 2.**

The X and Y axes indicate the accuracy and the frequency of the model, respectively. Each mean diagnostic accuracy (%) is included.

D) In the combination of GBM vs. others and PCNSL vs. others, the mean accuracy was 0.76.

E) In the combination of PCNSL vs. others and Meta vs. others, the mean accuracy was 0.80.

F) In the combination of GBM vs. others and Meta vs. others, the mean accuracy was 0.79.

D)

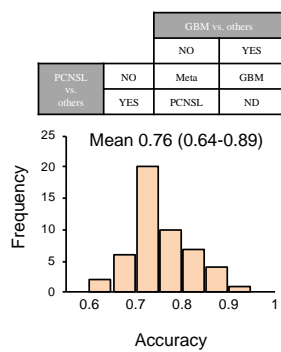

E)

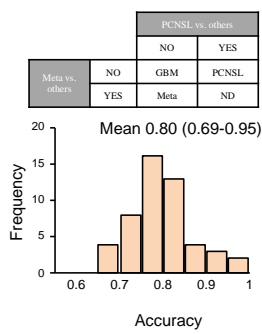

F)

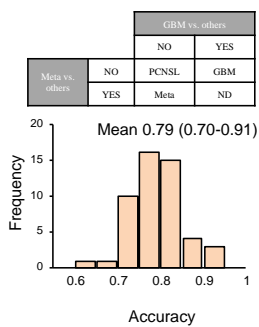

## References

1. Arita H, Narita Y, Matsushita Y, et al. Development of a robust and sensitive pyrosequencing assay for the detection of IDH1/2 mutations in gliomas. *Brain Tumor Pathol* 2015;32:22–30.
2. Okita Y, Narita Y, Miyakita Y, et al. IDH1/2 mutation is a prognostic marker for survival and predicts response to chemotherapy for grade II gliomas concomitantly treated with radiation therapy. *Int J Oncol* 2012;41: 1325–36.
